# Supplementary material
Source: PubMed Central journal article supplement (PMC4053458)
Supplement: epi-9-396-s01.pdf [file epi-9-396-s01.pdf]

## **Supplemental Material to:**

**Sajin Bae, Cornelia M Ulrich, Lynn B Bailey, Olga Malysheva, Elissa C Brown, Marian L Neuhouser, Ting-Yuan David Cheng, Joshua W Miller, Yingye Zheng, Liren Xiao, Lifang Hou, Xiaoling Song, Katharina Buck, Shirley AA Beresford, and Marie A Caudill**

**Impact of folic acid fortification on global DNA methylation and one-carbon biomarkers in the Women's Health Initiative Observational Study cohort**

**Epigenetics 2013; 9(3)**

**<http://dx.doi.org/10.4161/epi.27323>**

**[http://www.landesbioscience.com/journals/epigenetics/  
article/27323/](http://www.landesbioscience.com/journals/epigenetics/article/27323/)**

**Supplementary Figure 1.**

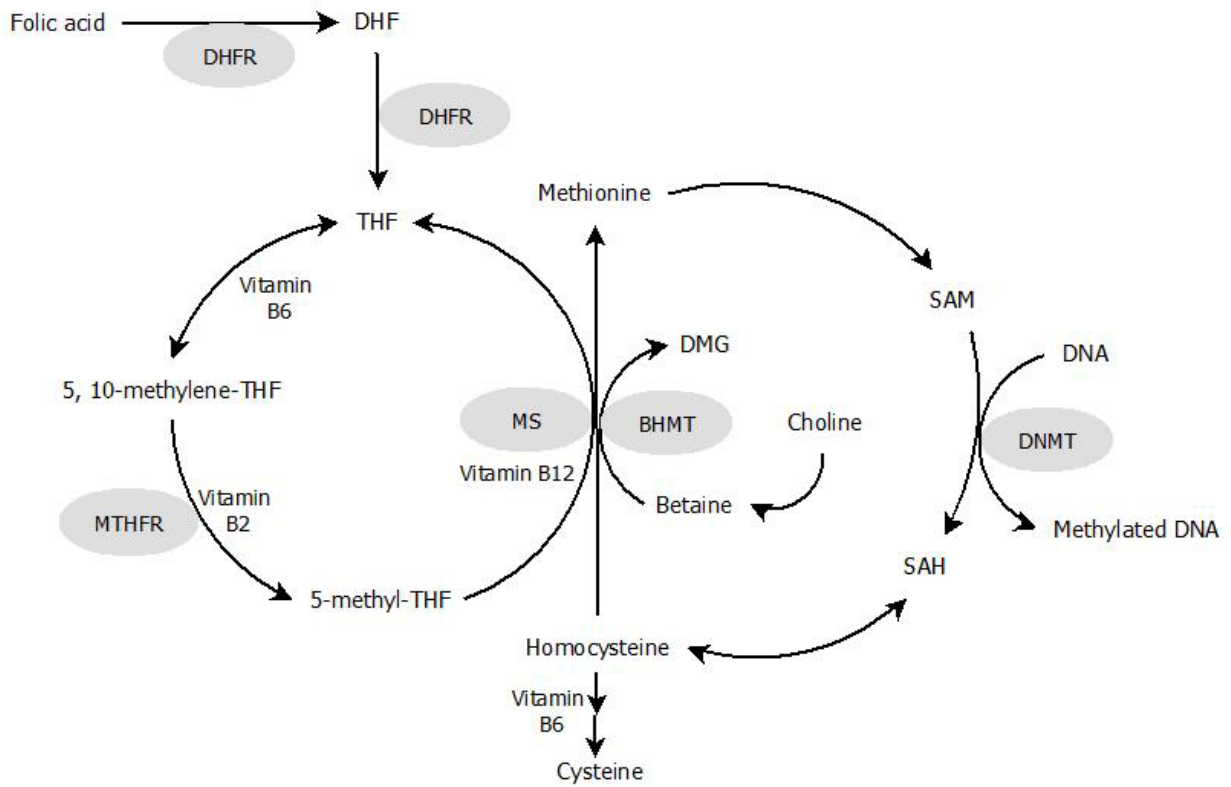

Simplified diagram of folate- and choline-mediated DNA methylation reactions. Relevant enzymes are highlighted in gray. Abbreviations: BHMT, betaine homocysteine methyltransferase; DHF, dihydrofolate; DHFR, dihydrofolate reductase; DMG, dimethylglycine; DNMT, DNA methyltransferase; MS, methionine synthase; MTHFR, methylenetetrahydrofolate reductase; SAH, S-adenosylhomocysteine; SAM, S-adenosylmethionine; THF, tetrahydrofolate.

**Supplementary Table 1.** Overall R<sup>2</sup> explained by all one-carbon biomarkers according to folic acid (FA) fortification period<sup>1,2</sup>

|                                | Overall unadjusted R <sup>2</sup> |
|--------------------------------|-----------------------------------|
| Pre-fortification (1994-1995)  | 0.12                              |
| Peri-fortification (1996-1997) | 0.12                              |
| Post-fortification (1998)      | 0.19                              |

<sup>1</sup>Unadjusted linear regression models were used by including all variables simultaneously.

<sup>2</sup>n=73 in the pre-fortification period; n=123 in the peri-fortification period; n=45 in the post-fortification period.

**Supplementary Table 2.** Predictors of baseline leukocyte global DNA methylation according to folic acid (FA) fortification period with all variables included in the statistical model<sup>1,2,3</sup>

|                                | FA fortification period |                   |                           |                        |                   |                           |                        |                   |                           |
|--------------------------------|-------------------------|-------------------|---------------------------|------------------------|-------------------|---------------------------|------------------------|-------------------|---------------------------|
|                                | Pre- (1994-1995)        |                   |                           | Peri- (1996-1997)      |                   |                           | Post- (1998)           |                   |                           |
|                                | $\beta$<br>Coefficient  | <i>P</i><br>value | Partial<br>R <sup>2</sup> | $\beta$<br>Coefficient | <i>P</i><br>value | Partial<br>R <sup>2</sup> | $\beta$<br>Coefficient | <i>P</i><br>value | Partial<br>R <sup>2</sup> |
| Plasma folate (ng/mL)          | -1.16                   | 0.79              | 0.001                     | -3.20                  | 0.19              | 0.015                     | 9.42                   | 0.13              | 0.066                     |
| RBC folate (ng/mL)             | 0.11                    | 0.53              | 0.006                     | -0.13                  | 0.24              | 0.012                     | -0.18                  | 0.52              | 0.012                     |
| Plasma vitamin B12 (pg/mL)     | 0.04                    | 0.84              | 0.001                     | -0.08                  | 0.65              | 0.002                     | 0.00                   | 0.99              | 0.000                     |
| Plasma MMA (nmol/L)            | -0.49                   | 0.38              | 0.012                     | 0.26                   | 0.55              | 0.003                     | -0.36                  | 0.64              | 0.007                     |
| Plasma choline ( $\mu$ mol/L)  | -44.37                  | 0.06              | 0.057                     | -10.37                 | 0.50              | 0.004                     | -37.03                 | 0.42              | 0.019                     |
| Plasma betaine ( $\mu$ mol/L)  | -1.78                   | 0.75              | 0.002                     | -1.83                  | 0.61              | 0.002                     | 8.60                   | 0.39              | 0.022                     |
| Plasma DMG ( $\mu$ mol/L)      | -0.85                   | 0.99              | 0.000                     | 61.89                  | 0.07              | 0.029                     | -89.57                 | 0.46              | 0.016                     |
| Plasma TMAO ( $\mu$ mol/L)     | 7.10                    | 0.31              | 0.016                     | 0.72                   | 0.86              | 0.000                     | -7.05                  | 0.53              | 0.012                     |
| Plasma Hcy ( $\mu$ mol/L)      | 16.22                   | 0.51              | 0.007                     | 11.84                  | 0.52              | 0.004                     | 72.77                  | 0.08              | 0.088                     |
| Plasma cysteine ( $\mu$ mol/L) | 0.08                    | 0.96              | 0.000                     | 0.06                   | 0.95              | 0.000                     | -2.10                  | 0.36              | 0.025                     |

<sup>1</sup>Unadjusted linear regression models were used by including all variables simultaneously.

<sup>2</sup>Beta ( $\beta$ ) coefficient indicates mean increase in DNA methylation per 1000-unit increase in one-carbon biomarker.

<sup>3</sup>n=73 in the pre-fortification period; n=123 in the peri-fortification period; n=45 in the post-fortification period.

Abbreviations used: RBC, red blood cell; MMA, methylmalonic acid; DMG, dimethylglycine; TMAO, trimethylamine *N*-oxide; Hcy, homocysteine.

**Supplementary Table 3.** Plasma folate concentrations (ng/mL) within the lowest and highest RBC folate groups according to folic acid (FA) fortification period<sup>1</sup>

|                                | Lowest RBC Folate group |                 | Highest RBC Folate group |                  | <i>P</i> value |
|--------------------------------|-------------------------|-----------------|--------------------------|------------------|----------------|
|                                | n                       | Median (IQR)    | n                        | Median (IQR)     |                |
| Pre-fortification (1994-1995)  | 70                      | 8.5 (5.8-14.6)  | 49                       | 25.1 (17.3-37.5) | < 0.001        |
| Peri-fortification (1996-1997) | 100                     | 9.2 (5.8-13.7)  | 100                      | 23.0 (17.2-30.3) | < 0.001        |
| Post-fortification (1998)      | 28                      | 12.8 (9.7-20.0) | 51                       | 25.3 (17.5-34.7) | < 0.001        |

<sup>1</sup>Linear regression models were used to compare median plasma folate concentrations between RBC folate groups and were adjusted for age, BMI, ethnicity, creatinine, and *MTHFR* C677T genotype.

**Supplementary Table 4.** Folic acid (FA) supplement use (%) within the lowest (n=202) and highest (n=206) RBC folate groups.

| FA supplement use | Lowest RBC folate group | Highest RBC folate group |
|-------------------|-------------------------|--------------------------|
| Yes               | 19.8% (40/202)          | 75.7% (156/206)          |
| No                | 80.2% (162/202)         | 24.3% (50/206)           |

**Supplementary Table 5.** RBC folate concentrations (ng/mL) within folic acid (FA) supplement users and non-supplement users according to FA fortification period<sup>1</sup>

|                                | FA supplement users |           | Non-FA supplement users |           | <i>P</i> value |
|--------------------------------|---------------------|-----------|-------------------------|-----------|----------------|
|                                | n                   | Mean ± SD | n                       | Mean ± SD |                |
| Pre-fortification (1994-1995)  | 56                  | 761 ± 282 | 66                      | 386 ± 173 | < 0.001        |
| Peri-fortification (1996-1997) | 103                 | 820 ± 317 | 101                     | 450 ± 220 | < 0.001        |
| Post-fortification (1998)      | 37                  | 814 ± 276 | 45                      | 582 ± 247 | 0.0495         |

<sup>1</sup>Linear regression models were used to compare mean RBC folate concentrations between FA supplement users and non-supplement users and were adjusted for age, BMI, ethnicity, creatinine, and *MTHFR* C677T genotype.
